# Supplementary material for: Novel zwitterionic deep eutectic solvents from trimethylglycine and carboxylic acids: characterization of their properties and their toxicity
Source: Royal Society of Chemistry journal article supplement (doi:10.1039/c4ra10628h), 2014-10-23
Supplement: c4ra10628h1.pdf [file c4ra10628h1.pdf]

**S1**, Melting points of Betaine with acids as a function of molar fraction  $x$

A

B

C

D

**Legend. Panel A:** (▲) D-(+)-Mandelic acid, (◆) Phenylacetic acid. **Panel B:** (▲) 4-Chloro-Benzoic Acid, (◇) 3-Chloro-Benzoic acid, (○) 2-Chloro-Benzoic acid.

**Panel C:** (■) Citric acid, (◆) Oxalic acid.

**Panel D:** (◆) 2-Furoic acid, (■) Salicylic acid.
